# Supplementary material for: A novel twelve class fluctuation test reveals higher than expected mutation rates for influenza A viruses
Source: eLife. 2017 Jun 9;6:e26437. doi: 10.7554/eLife.26437 (PMC5511008; doi:10.7554/eLife.26437)
Supplement: Figure 1—source data 1. — DOI: http://dx.doi.org/10.7554/eLife.26437.003 [file elife-26437-fig1-data1.xlsx]

## Sheet: Sheet1
	Plasmid derived RNA	Virus derived RNA
A->U	6.95e-07	1.3e-06
C->A	2.47e-06	7.16e-06
C->G	1.05e-05	6.53e-06
C->U	4e-06	4.57e-06
G->A	0.00013	8.46e-05
G->U	4.1e-06	3.28e-06
U->A	3.95e-06	3.46e-06
U->G	4.45e-07	1.25e-06
