# Supplementary material for: A novel twelve class fluctuation test reveals higher than expected mutation rates for influenza A viruses
Source: eLife. 2017 Jun 9;6:e26437. doi: 10.7554/eLife.26437 (PMC5511008; doi:10.7554/eLife.26437)
Supplement: Figure 1—source data 2. — DOI: http://dx.doi.org/10.7554/eLife.26437.004 [file elife-26437-fig1-data2.xlsx]

## Sheet: Sheet1
	Cell derived RNA	Viral derived RNA
A->U	1.559	4.5026
C->A	1.485	1.1952
C->G	1.3682	1.6598
C->U	1.1852	6.5833
G->A	1.014	1.9814
G->U	1.0743	6.2267
U->A	1.1124	1.8472
U->G	1.0112	5.824
