# Supplementary material for: A novel twelve class fluctuation test reveals higher than expected mutation rates for influenza A viruses
Source: eLife. 2017 Jun 9;6:e26437. doi: 10.7554/eLife.26437 (PMC5511008; doi:10.7554/eLife.26437)
Supplement: Figure 2—source data 1. — DOI: http://dx.doi.org/10.7554/eLife.26437.007 [file elife-26437-fig2-data1.xlsx]

## Sheet: Sheet1
Time / hr	32˚C									37˚C									39˚C
0	960	970	1140	850	1350	1000	1080	1010		1230	1340	920	1000	930	1350	1120	960		1040	980	1220	1220	920	920	1100	1040
14	910	1150	1030	1240	640	880	860	1050		9370	10990	7320	8070	4280	11280	7200	6860		1050	3440	2460	2060	820	1070	780	2670
16	1380	990	2770	1620	2270	1020	410	1160		11810	33910	6680	19040	15060	19610	11510	17320		2400	2830	560	2170	3130	1370	1230	1660
18	2980	2390	1410	1050	2190	1790	1010	1550		42260	45070	35770	39720	43660	25850	44410	48690		4350	5130	4180	9810	3900	8030	6170	4670
20	6450	10080	5100	7450	3790	4800	5760	2520		84160	66500	90050	81430	86070	82580	85430	81760		17760	29290	25000	21170	17340	19300	23190	18500
22	12160	13610	13570	9900	10500	8830	8640	6140		125900	114980	127990	107360	145540	143820	105610	131150		23120	27240	41530	10370	28740	1580	30070	49770
24	12210	15930	19560	19270	10000	7990	13410	8910		144880	140950	127620	142180	172750	138510	173500	173530		46980	45560	43520	65980	51240	41050	86300	34170
26	16760	15950	25320	27170	16960	38780	16280	20020		144790	139700	140980	149790	205850	182400	171660	210620		57950	0	42790	56700	80030	41530	57060	52850
