# Supplementary material for: A novel twelve class fluctuation test reveals higher than expected mutation rates for influenza A viruses
Source: eLife. 2017 Jun 9;6:e26437. doi: 10.7554/eLife.26437 (PMC5511008; doi:10.7554/eLife.26437)
Supplement: Figure 2—source data 2. — DOI: http://dx.doi.org/10.7554/eLife.26437.008 [file elife-26437-fig2-data2.xlsx]

## Sheet: Sheet1
WT GFP	A -> C	A -> G	C -> A	G -> C	U -> A	U -> G
0.91	1.0311	0.7	0.76	1.13	1.0288	0.898566
1.16	1.41221	0.93	1.05	1.02	1.20224	0.837838
0.88	0.987459	1.13	0.79	1.04	0.821732	1.00574
1.00202
1.01802
1.02568
