# Supplementary material for: A novel twelve class fluctuation test reveals higher than expected mutation rates for influenza A viruses
Source: eLife. 2017 Jun 9;6:e26437. doi: 10.7554/eLife.26437 (PMC5511008; doi:10.7554/eLife.26437)
Supplement: Figure 2—source data 3. — DOI: http://dx.doi.org/10.7554/eLife.26437.009 [file elife-26437-fig2-data3.xlsx]

## Sheet: Sheet1
base	free energy
50	-17.3
70	-25.4
90	-34.1
110	-35
130	-42.9
150	-39.2
170	-44.1
190	-27.1
210	-39
230	-35.1
250	-21.4
270	-18.7
290	-21
310	-22.6
330	-24.1
350	-23.6
370	-22
390	-26.4
410	-27
430	-26.2
450	-28.3
470	-24.5
490	-23.6
510	-20.6
530	-19.4
550	-15.9
570	-16
590	-22.4
610	-19.8
630	-31.4
650	-29.6
670	-16.1
690	-15.2
710	-17.7
730	-20.8
750	-29.3
770	-34.8
790	-34
810	-28.5
830	-20.5
850	-22.2
870	-24.2
890	-24.2
