# Supplementary material for: A novel twelve class fluctuation test reveals higher than expected mutation rates for influenza A viruses
Source: eLife. 2017 Jun 9;6:e26437. doi: 10.7554/eLife.26437 (PMC5511008; doi:10.7554/eLife.26437)
Supplement: Figure 3—source data 1. — DOI: http://dx.doi.org/10.7554/eLife.26437.011 [file elife-26437-fig3-data1.xlsx]

## Sheet: Sheet1
(B) A->G					(C) G->A					(D) G->C
No drug	AzaC	5 FU	Riba		No drug	AzaC	5 FU	Riba		No drug	AzaC	5 FU
0.000128	8.52e-05	0.001117	0.00029		2.91e-05	1.16e-05	0.00015	0.000144		8.01e-05	0.000123	1.33e-05
0.000181	0.000403	0.001229	0.000188		3.29e-05	2.74e-05	0.000104	7.5e-05		3.41e-05	0.0003	4.62e-05
0.000131	0.00052	0.001721	0.000263		3.19e-05	2.26e-05	0.000169	0.000109		4.9e-05	0.00018	3.06e-05
0.000373
