# Supplementary material for: A novel twelve class fluctuation test reveals higher than expected mutation rates for influenza A viruses
Source: eLife. 2017 Jun 9;6:e26437. doi: 10.7554/eLife.26437 (PMC5511008; doi:10.7554/eLife.26437)
Supplement: Figure 4—source data 1. — DOI: http://dx.doi.org/10.7554/eLife.26437.013 [file elife-26437-fig4-data1.xlsx]

## Sheet: Sheet1
PR8					HK
2.52e-05	1.22e-05	7.65e-06			3.88e-05	2.26e-05	3.99e-05
0.000128	0.000181	0.000131	0.000373		0.000512	0.000182	0.000321
6.34739e-06	4.30489e-05	4.9e-06	1.73e-05		1.12e-05	1.72e-05	1.1e-05
1.1483e-05	8.72726e-06	2.91745e-06			1.16e-05	1.31e-05	2.71e-05
3.01276e-06	7.53327e-06	4.7279e-06			1.82e-05	8.37e-06	2.69e-06
2.82629e-05	1.98735e-05	3.34955e-05			3.87e-05	6.37e-05	3.53e-05
2.90997e-05	3.28895e-05	3.18781e-05			7.67e-05	7.95e-05	5.51e-05	7.74e-05
8.01491e-05	3.4092e-05	4.89946e-05			3.55e-05	2.42e-05	2.35e-05
2.85875e-05	4.59837e-05	3.11962e-05			7.79e-05	4.61e-05	5.64e-05
9.28228e-06	2.12648e-05	1.07133e-05			6.56e-06	3.8e-06	3.26e-06
0.000171719	0.000255774	0.000265657			0.00017	0.000464	0.000310806	0.000292368
3.65535e-05	5.67664e-05	1.0778e-05			6.17103e-05	1.82053e-05	2.95043e-05
