# Supplementary material for: A novel twelve class fluctuation test reveals higher than expected mutation rates for influenza A viruses
Source: eLife. 2017 Jun 9;6:e26437. doi: 10.7554/eLife.26437 (PMC5511008; doi:10.7554/eLife.26437)
Supplement: Figure 4—source data 2. — DOI: http://dx.doi.org/10.7554/eLife.26437.014 [file elife-26437-fig4-data2.xlsx]

## Sheet: Sheet1
Hong Kong H3N2 backbone
																											22 of 28 experiments follow a poisson distribution
Virus for	Number of wells with n green cells																										Chi square p-value
mutation class (AC = A->C)	n = 0	1	2	3	4	5	6	7	8	9	10
AC	17	6																									#DIV/0!
AC	14	5	1	2		1																					#DIV/0!
AC	14	5	3	1																							#DIV/0!
AG	14	3	2																								#DIV/0!
AG	13	7	3					1																			#DIV/0!
AG	8	7	3	3					1																		#DIV/0!
AU	17	3	1	2																							#DIV/0!
AU	19	2		1				1																			#DIV/0!
AU	19	3	1																								#DIV/0!
CA	19	3	1																								#DIV/0!
CA	18	5																									#DIV/0!
CA	12	8	3																								#DIV/0!
CG	18	5																									#DIV/0!
CG	21	2																									#DIV/0!
CG	20	3																									#DIV/0!
CU	10	3	7	2	1																						#DIV/0!
CU	9	7	5	2																							#DIV/0!
CU	11	5	1	5																							#DIV/0!
GA	6	6	5	3		1	1		1																		#DIV/0!
GA	8	11	3		1																						#DIV/0!
GA	10	12				1			1																		#DIV/0!
GA	7	11	1	4																							#DIV/0!
GC	12	8	1		2																						#DIV/0!
GC	13	5	4	1																							#DIV/0!
GC	15	5	2	1																							#DIV/0!
GU	6	9	5	2																							#DIV/0!
GU	10	9	4																								#DIV/0!
GU	8	6	1	1																							#DIV/0!
UA	20	3
UA	21	2
UA	21	2
UC	10	4	4
UC	5	10	7	1
UC	6	9	3		2	2
UG	19	4
UG	20	2	1
UG	20	3
