# Supplementary material for: A novel twelve class fluctuation test reveals higher than expected mutation rates for influenza A viruses
Source: eLife. 2017 Jun 9;6:e26437. doi: 10.7554/eLife.26437 (PMC5511008; doi:10.7554/eLife.26437)
Supplement: Figure 5—source data 1. — DOI: http://dx.doi.org/10.7554/eLife.26437.016 [file elife-26437-fig5-data1.xlsx]

## Sheet: Sheet1
	32°C				37°C					39°C
A -> G	0.000318	0.000292	0.000502		0.000128	0.000181	0.000131	0.000373		0.00022	0.000519	0.000539
C -> U	3.67e-05	3.7e-05	1.48e-05		2.83e-05	1.99e-05	3.35e-05			3.79e-05	1.76e-05	2.09e-05
G -> A	1.93e-05	1.68e-05	2.6e-05		2.91e-05	3.29e-05	3.19e-05			4.12e-05	1.89e-05	3.71e-05
G -> U	3.55e-05	4.93e-05	4.26e-05		2.86e-05	4.6e-05	3.12e-05			4.6e-05	6.15e-05	2.34e-05
U -> C	0.000208	0.000372	0.000255		0.000172	0.000256	0.000266			0.000422	0.000122	0.000367
